# Supplementary material for: High spatial resolution and precision NanoSIMS for sulfur isotope analysis
Source: Royal Society of Chemistry journal article supplement (doi:10.1039/d2ja00248e), 2022-01-01
Supplement: d2ja00248e1.xlsx [file d2ja00248e1.xlsx]

## Sheet: Table1 shuiyingdong data
Filename	32S Counts	32S Rate	34S Counts	34S Rate	34S/32S Ratio	34S/32S Err Mean	34S/32S Poisson	34Sraw	IMF34S	δ34Scor	SE	SD
SYD-3-1-1	724262000	3862730	3.16741E+007	168929	0.043733	0.0217	0.0182	-9.72769		-3.13772	0.217	0.275854
SYD-3-1-2	757934000	4042310	3.33222E+007	177718	0.0439646	0.0261	0.0177	-4.48343		2.10654	0.261	0.311652
SYD-3-1-3	828801000	4420270	3.59890E+007	191941	0.0434229	0.0226	0.017	-16.7495		-10.1595	0.226	0.282988
SYD-3-1-4	829516000	4424090	3.58854E+007	191389	0.0432606	0.0227	0.0171	-20.4245		-13.8346	0.227	0.283787
SYD-3-1-5	702269000	3745430	3.05669E+007	163023	0.043526	0.0304	0.0185	-14.4149		-7.82494	0.304	0.348457
SYD-3-1-6	819666000	4371550	3.57525E+007	190680	0.0436184	0.0225	0.0171	-12.3226		-5.73267	0.225	0.28219
SYD-3-1-7	825943000	4405030	3.62123E+007	193132	0.0438435	0.0212	0.017	-7.22557		-0.6356	0.212	0.271938
SYD-3-1-8	853920000	4554240	3.62909E+007	193551	0.0424992	0.0213	0.0169	-37.6654		-31.0754	0.213	0.272718
SYD-3-1-9	755614000	4029940	3.12553E+007	166695	0.0413641	0.0321	0.0183	-63.3681		-56.7781	0.321	0.363383
SYD-3-1-10	865172000	4614250	3.65111E+007	194726	0.042201	0.0276	0.0169	-44.4177		-37.8277	0.276	0.324318
SYD-3-1-11	940510000	5016050	3.88699E+007	207306	0.0413285	0.0314	0.0164	-64.1742		-57.5842	0.314	0.357215
SYD-3-1-12	885361000	4721930	3.67824E+007	196173	0.041545	0.0299	0.0168	-59.2719		-52.6819	0.299	0.344104
SYD-3-1-13	795552000	4242940	3.28206E+007	175043	0.0412552	0.0202	0.0178	-65.834		-59.244	0.202	0.264216
SYD-3-1-14	730785000	3897520	3.11890E+007	166341	0.0426787	0.0277	0.0183	-33.6008		-27.0109	0.277	0.32517
SYD-3-1-15	146691000	782352	6.23154E+006	33234.9	0.0424809	0.127	0.0409	-38.0797		-31.4898	1.27	1.28137
SYD-3-1-16	575606000	3069900	2.51141E+007	133942	0.0436307	0.0285	0.0204	-12.0441		-5.45416	0.285	0.332011
balmat	653153000	4024360	2.90963E+007	179275	0.0445475	0.0254	0.0189	8.71552	6.38448	15.3055	0.254	0.305814
balmat	660008000	4066590	2.93963E+007	181123	0.0445394	0.0263	0.0189	8.53211	6.56789	15.1221	0.263	0.313329
balmat	646141000	3981150	2.87792E+007	177321	0.0445402	0.0249	0.0191	8.55022	6.54978	15.1402	0.249	0.301674
balmat	657747000	4052660	2.92872E+007	180451	0.0445266	0.0246	0.0189	8.24227	6.85773	14.8322	0.246	0.299203
									AVERAGE IMF
									6.58997
									0.170312
