# Supplementary material for: High spatial resolution and precision NanoSIMS for sulfur isotope analysis
Source: Royal Society of Chemistry journal article supplement (doi:10.1039/d2ja00248e), 2022-01-01
Supplement: d2ja00248e2.xlsx [file d2ja00248e2.xlsx]

## Sheet: Spot to spot test
Spot to spot test
Id	Filename	32S Counts	32S Rate	34S Counts	34S Rate	34S/32S Ratio	34S/32S Err Mean	34S/32S Poisson	34Sraw	IMF34S	δ34Scor	SE	SD	δ34Scor-average	SD
1	Balmat_1	635148000	3913420	28263900	174146	0.0444997	0.0257	0.0192	7.63316	7.46684	15.8929	0.257	0.515655
2	Balmat_2	680852000	4195020	30286100	186606	0.0444827	0.0263	0.0186	7.24821	7.85179	15.5079	0.263	0.518672
3	Balmat_3	688013000	4239140	30584900	188447	0.044454	0.0243	0.0185	6.59834	8.50166	14.8581	0.243	0.508823
4	Balmat_4	697731000	4299020	31011500	191075	0.0444462	0.0242	0.0184	6.42172	8.67828	14.6814	0.242	0.508346
5	Balmat_5	704992000	4343760	31349500	193158	0.0444679	0.0245	0.0183	6.91309	8.18691	15.1728	0.245	0.509781
6	Balmat_6	708720000	4366730	31534400	194297	0.0444949	0.0264	0.0182	7.52447	7.57553	15.7842	0.264	0.51918
7	Balmat_7	709027000	4368620	31552500	194409	0.0445012	0.0257	0.0182	7.66712	7.43288	15.9268	0.257	0.515655	15.1	0.447047
8	Balmat_8	703495000	4334530	31284400	192757	0.04447	0.0256	0.0183	6.96064	8.13936	15.2204	0.256	0.515158
9	Balmat_9	709753000	4373090	31549800	194392	0.0444518	0.0244	0.0182	6.54853	8.55147	14.8082	0.244	0.509301
10	Balmat_10	711155000	4381730	31612100	194776	0.0444518	0.0261	0.0182	6.54853	8.55147	14.8082	0.261	0.517661
11	Balmat_11	709684000	4372670	31563500	194476	0.0444755	0.026	0.0182	7.08518	8.01482	15.3449	0.26	0.517157
12	Balmat_12	712853000	4392190	31702500	195333	0.0444726	0.0263	0.0182	7.01951	8.08049	15.2792	0.263	0.518672
13	Balmat_13	708393000	4364710	31489200	194018	0.0444516	0.0252	0.0182	6.544	8.556	14.8037	0.252	0.513182
14	Balmat_14	709486000	4371450	31523300	194229	0.0444311	0.0252	0.0182	6.07981	9.02019	14.3395	0.252	0.513182
15	Balmat_15	710996000	4380750	31598700	194693	0.0444429	0.025	0.0182	6.347	8.753	14.6067	0.25	0.512203
16	Balmat_16	709433000	4371120	31558500	194445	0.0444842	0.0279	0.0182	7.28218	7.81782	15.5419	0.279	0.526965
17	Balmat_17	703357000	4333680	31273900	192692	0.0444637	0.0279	0.0183	6.81799	8.28201	15.0777	0.279	0.526965
18	Balmat_18	707445000	4358870	31443600	193738	0.0444468	0.0244	0.0182	6.43531	8.66469	14.695	0.244	0.509301
19	Balmat_19	715754000	4410070	31809500	195992	0.044442	0.0246	0.0181	6.32662	8.77338	14.5863	0.246	0.510262
20	Balmat_20	710105000	4375260	31573500	194538	0.0444631	0.0252	0.0182	6.8044	8.2956	15.0641	0.252	0.513182
									IMF(average)	8.25971
									SD	0.447047
grain to grain test
Id	Filename	32S Counts	32S Rate	34S Counts	34S Rate	34S/32S Ratio	34S/32S Err Mean	34S/32S Poisson	34Sraw	IMF34S	δ34Scor	SE	SD	δ34Scor-average	SD
1	srzk-1@1_1	698339000	4302770	3.07024E+007	189171	0.0439648	0.0242	0.0184	-4.4789		3.09776	0.242	0.385536
2	srzk-1@1_2	709954000	4374330	3.12350E+007	192452	0.0439959	0.0235	0.0183	-3.77469		3.80198	0.235	0.381181
3	srzk-1@1_3	712531000	4390210	3.13345E+007	193065	0.0439764	0.024	0.0183	-4.21624		3.36043	0.24	0.384284
4	srzk-1@1_4	666929000	4109240	2.93356E+007	180749	0.0439862	0.0233	0.0189	-3.99433		3.58234	0.233	0.379951	3.52912	0.486093
5	srzk-1@1_5	658240116	4055700	2.89699E+007	178496	0.0440111	0.026	0.019	-3.4305		4.14616	0.26	0.397082
6	srzk-1@1_6	697212000	4295820	3.06498E+007	188847	0.0439605	0.0237	0.0185	-4.57627		3.0004	0.237	0.382417
7	srzk-1@1_7	707876000	4361530	3.11087E+007	191674	0.0439465	0.0223	0.0183	-4.89328		2.68339	0.223	0.373902
8	srzk-1@1_8	713624000	4396940	3.13924E+007	193422	0.0439902	0.0227	0.0182	-3.90376		3.67291	0.227	0.376302
9	srzk-1@1_9	714859000	4404550	3.14681E+007	193888	0.04402	0.0252	0.0182	-3.22898		4.34769	0.252	0.39189
10	srzk-1@1_10	714403000	4401740	3.14244E+007	193619	0.0439869	0.0229	0.0182	-3.97848		3.59819	0.229	0.377512
1	ruttan2@1_1	677203000	4172540	2.97068E+007	183036	0.0438668	0.0256	0.0187	-6.69798		0.878691	0.256	0.394474
2	ruttan2@1_2	679444000	4186350	2.98199E+007	183733	0.0438887	0.0242	0.0187	-6.20208		1.37459	0.242	0.385536
3	ruttan2@1_3	679485000	4186600	2.98355E+007	183829	0.043909	0.0243	0.0187	-5.74242		1.83425	0.243	0.386164
4	ruttan2@1_4	686134000	4227570	3.01109E+007	185526	0.0438849	0.025	0.0186	-6.28813		1.28854	0.25	0.390607
5	ruttan2@1_5	695477000	4285130	3.05080E+007	187973	0.0438662	0.0252	0.0185	-6.71156		0.865104	0.252	0.39189	1.07093	0.334167
6	ruttan2@1_6	699913000	4312460	3.07072E+007	189200	0.0438729	0.0251	0.0184	-6.55985		1.01682	0.251	0.391248
7	ruttan2@1_7	693148000	4270780	3.03979E+007	187295	0.0438548	0.0263	0.0185	-6.9697		0.606967	0.263	0.399053
8	ruttan2@1_8	675162000	4159960	2.96248E+007	182531	0.043878	0.0253	0.0188	-6.44437		1.1323	0.253	0.392534
9	ruttan2@1_9	692954000	4269590	3.03976E+007	187293	0.0438667	0.0253	0.0185	-6.70024		0.876426	0.253	0.392534
10	ruttan2@1_10	695115000	4282900	3.04912E+007	187869	0.0438649	0.0257	0.0185	-6.741		0.835668	0.257	0.395124
1	balmet2@1_1	672414000	4143030	2.99118E+007	184299	0.0444842	0.0272	0.0187	7.28218	7.81782	14.8588	0.272	0.405041
2	balmet2@1_2	679510000	4186750	3.02511E+007	186390	0.044519	0.024	0.0186	8.07018	7.02982	15.6468	0.24	0.384284
3	balmet2@1_3	675705000	4163310	3.00470E+007	185132	0.0444677	0.0249	0.0186	6.90856	8.19144	14.4852	0.249	0.389968
4	balmet2@1_4	680037000	4190000	3.02513E+007	186391	0.0444848	0.0256	0.0186	7.29577	7.80423	14.8724	0.256	0.394474
5	balmet2@1_5	681687000	4200170	3.03302E+007	186877	0.0444929	0.0248	0.0186	7.47918	7.62082	15.0558	0.248	0.38933	15.1	0.300123
6	balmet2@1_6	683756000	4212910	3.04264E+007	187470	0.0444989	0.0262	0.0185	7.61504	7.48496	15.1917	0.262	0.398394
7	balmet2@1_7	683596000	4211930	3.04251E+007	187462	0.0445075	0.026	0.0185	7.80978	7.29022	15.3864	0.26	0.397082
8	balmet2@1_8	678351000	4179610	3.01865E+007	185992	0.0444998	0.0245	0.0186	7.63542	7.46458	15.2121	0.245	0.387426
9	balmet2@1_9	678429000	4180090	3.01894E+007	186010	0.044499	0.0253	0.0186	7.61731	7.48269	15.194	0.253	0.392534
10	balmet2@1_10	677596000	4174960	3.01494E+007	185763	0.0444947	0.0251	0.0186	7.51994	7.58006	15.0966	0.251	0.391248
1	1117t2@1_1	666524000	4106740	2.92282E+007	180087	0.0438516	0.024	0.0189	-7.04216		0.534508	0.24	0.384284
2	1117t2@1_2	676696000	4169410	2.96684E+007	182800	0.043843	0.0255	0.0188	-7.23689		0.339773	0.255	0.393826
3	1117t2@1_3	689180000	4246330	3.02215E+007	186208	0.0438514	0.0228	0.0186	-7.04669		0.529979	0.228	0.376906
4	1117t2@1_4	691267000	4259190	3.03059E+007	186728	0.043841	0.0252	0.0186	-7.28218		0.294486	0.252	0.39189	0.286334	0.408169
5	1117t2@1_5	679883000	4189050	2.98027E+007	183627	0.0438351	0.023	0.0187	-7.41578		0.160889	0.23	0.378119
6	1117t2@1_6	691767000	4262270	3.02991E+007	186686	0.0437995	0.0222	0.0186	-8.22189		-0.645223	0.222	0.373307
7	1117t2@1_7	679398000	4186060	2.97851E+007	183519	0.0438404	0.0247	0.0187	-7.29577		0.2809	0.247	0.388694
8	1117t2@1_8	687171000	4233960	3.01493E+007	185763	0.0438745	0.0265	0.0186	-6.52362		1.05305	0.265	0.400374
9	1117t2@1_9	692679000	4267890	3.03677E+007	187108	0.043841	0.0246	0.0185	-7.28218		0.294486	0.246	0.388059
10	1117t2@1_10	690515000	4254560	3.02645E+007	186473	0.0438289	0.0239	0.0186	-7.55617		0.0204983	0.239	0.38366
									IMF(average)	7.57667
									SD	0.300123
